# Supplementary material
Source: PubMed Central journal article supplement (PMC4084716)
Supplement: NIHMS583343-supplement-01.pdf [file NIHMS583343-supplement-01.pdf]

# Supplemental Data

## **p62 Binding to Protein Kinase C $\zeta$ Regulates Tumor Necrosis Factor $\alpha$ -Induced Apoptotic Pathway in Endothelial Cells**

Geun-Young Kim, Patrizia Nigro, Keigi Fujiwara, Jun-ichi Abe, Bradford C. Berk

Aab Cardiovascular Research Institute, Department of Medicine, University of Rochester  
School of Medicine and Dentistry, Rochester, NY 14642

Patrizia Nigro is currently at Laboratorio di Biologia Vascolare e Medicina Rigenerativa  
Centro Cardiologico Monzino-IRCCS, Via Parea 4, 20138 Milano, Italia

Correspondence: Bradford C. Berk, M.D., Ph.D.

Aab Cardiovascular Research Institute, University of Rochester, 601

Elmwood Avenue, Box CVRI, Rochester, NY 14642

Phone: (585) 275-3407, Fax: (585) 273-1059

E-mail: [Bradford\\_Berk@urmc.rochester.edu](mailto:Bradford_Berk@urmc.rochester.edu)

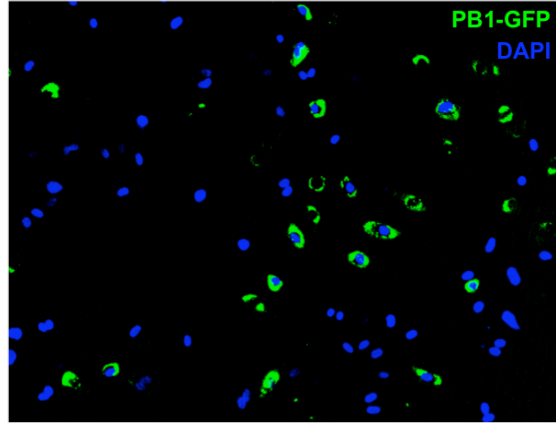

**Supplemental Figure I. Transfection of PB1-GFP.**

After transfection of PB1-GFP, the expression of GFP was analyzed in randomly selected 5 areas under the Olympus BX51 fluorescent microscope. The representative image is shown.

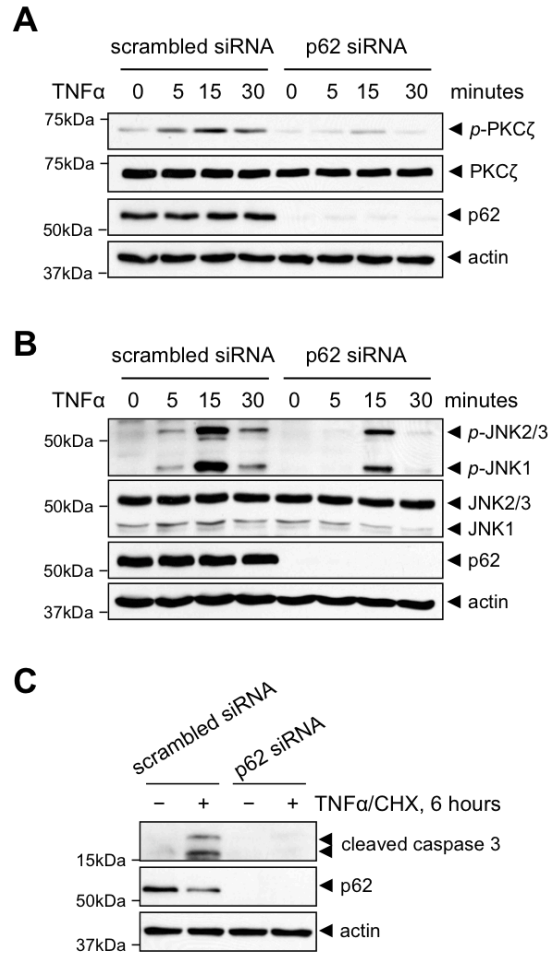

**Supplemental Figure II. Inhibitory effect of siRNA-mediated p62 depletion on TNF $\alpha$ -induced PKC $\zeta$  signaling cascade.**

p62 siRNA (Dharmacon RNA Technologies, D-010230-03, 80 nmol/L) was transfected into HUVEC as described in Materials and Methods. The cells were stimulated with TNF $\alpha$  (10 ng/mL) alone or TNF $\alpha$  (10 ng/mL) + CHX (10  $\mu$ g/mL) for the indicated times and the phosphorylation of PKC $\zeta$  (A) and JNK (B) and cleavage of caspase 3 (C) were analyzed by western blotting.

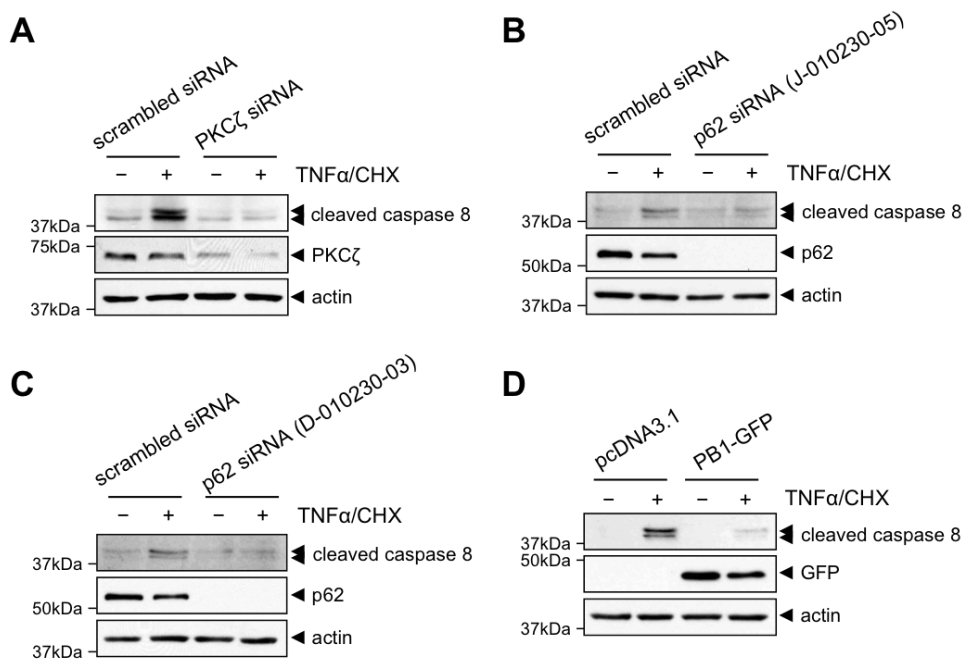

**Supplemental Figure III. p62-PKC $\zeta$  pathway regulates caspase 8 activation in response to TNF $\alpha$  + CHX.**

Either PKC $\zeta$ - (Dharmacon RNA Technologies, L-003526-00, 100 nmol/L; A) or p62- (Dharmacon RNA Technologies, J-010230-05, 80 nmol/L; B or D-010230-03, 80 nmol/L; C) depleted HUVEC were stimulated with TNF $\alpha$  (10 ng/mL) + CHX (10  $\mu$ g/mL) for 6 hours and the cleavage of caspase 8 was analyzed by western blotting. (D) Either pcDNA3.1- or PB1-GFP-transfected HUVEC were stimulated with TNF $\alpha$  (10 ng/mL) + CHX (10  $\mu$ g/mL) for 6 hours and the cleavage of caspase 8 was analyzed by western blotting.

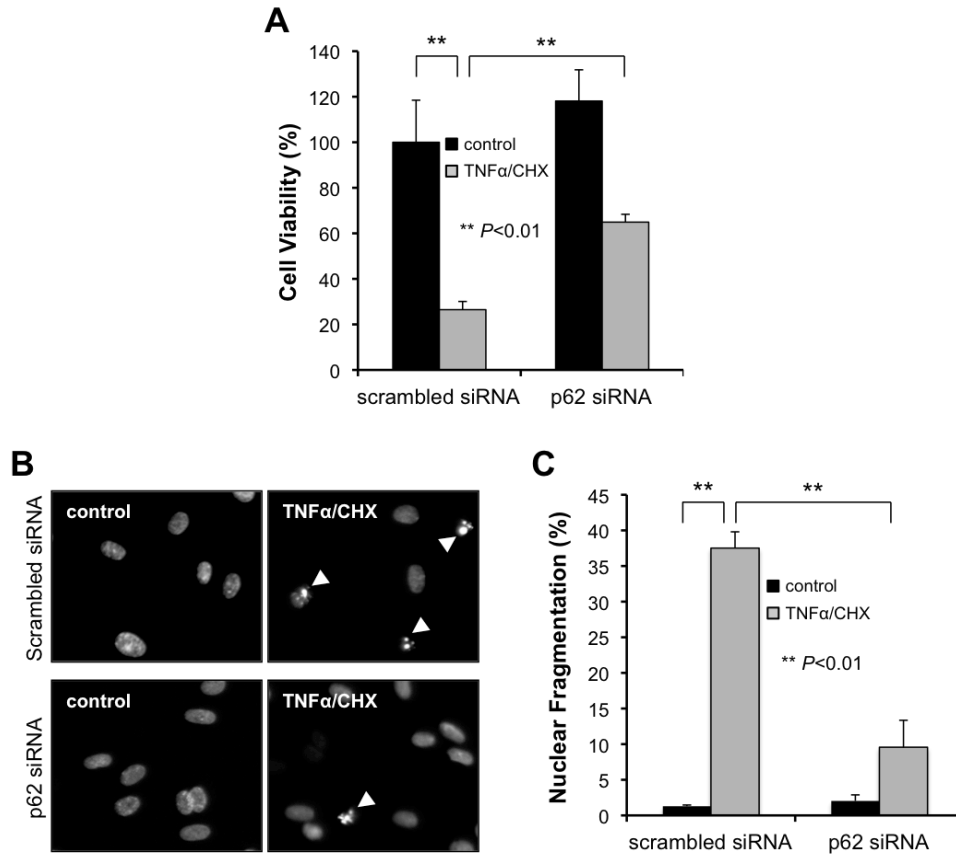

**Supplemental Figure IV. Inhibitory effect of siRNA-mediated p62 depletion on TNF $\alpha$ -induced apoptotic cell death.**

p62 siRNA (Dharmacon RNA Technologies, D-010230-03, 80 nmol/L) was transfected into HUVEC as described in Materials and Methods. The cells were stimulated with TNF $\alpha$  (10 ng/mL) + CHX (10  $\mu$ g/mL) for 24 hours and a MTT assay (A), DAPI staining (B; apoptotic cells were indicated by white arrow) and quantification of apoptotic nuclear body (C) were performed as described in Figure 6.

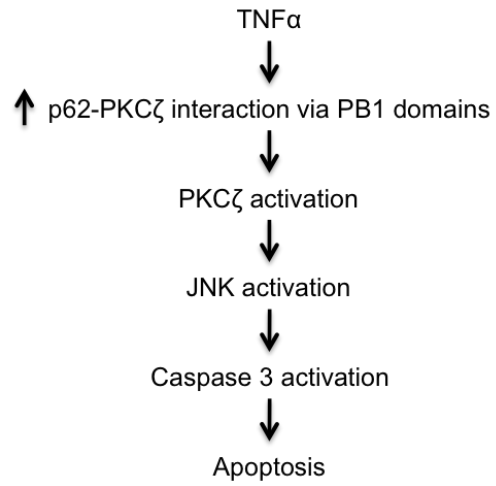

**Supplemental Figure V. A model for the requirement of p62 and PKC $\zeta$  interaction for the PKC $\zeta$  signaling cascade that leads to endothelial cell apoptosis.**

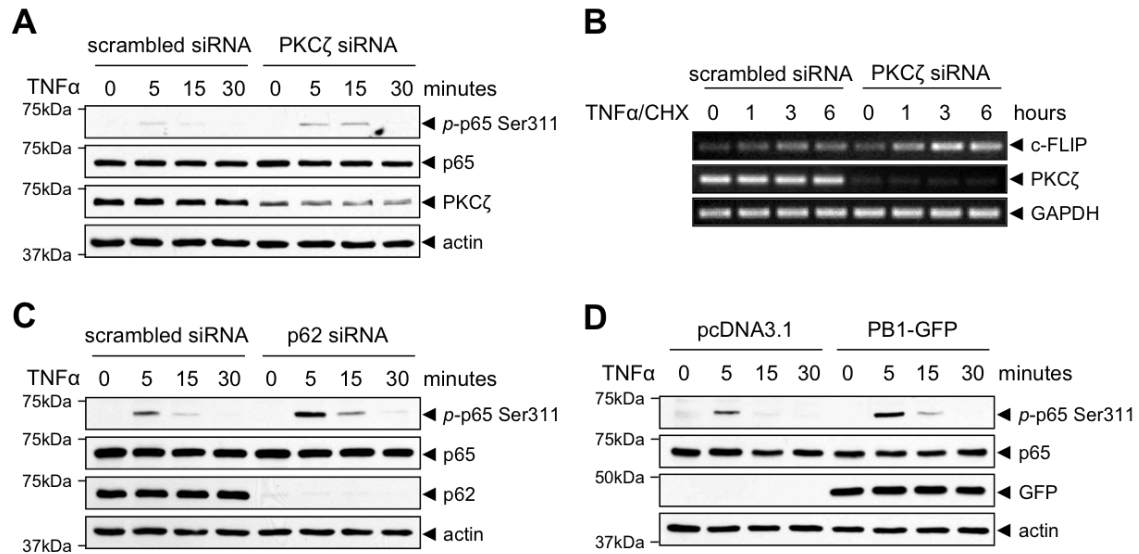

**Supplemental Figure VI. PKC $\zeta$  negatively regulates TNF $\alpha$ -induced phosphorylation of p65 Ser311.**

(A) PKC $\zeta$  (Dharmacon RNA Technologies, L-003526-00, 100 nmol/L) or scrambled siRNA were transfected into HUVEC which were then stimulated with TNF $\alpha$  (10 ng/mL) for the indicated times and phosphorylation of p65 Ser311 was analyzed by western blotting. (B) PKC $\zeta$  or scrambled siRNA were transfected into HUVEC which were then stimulated with TNF $\alpha$  (10 ng/mL) + CHX (10  $\mu$ g/mL) for the indicated times and reverse transcription (RT)-PCR was performed using a reverse transcription kit (Promega, Madison, WI) to measure c-FLIP expression. Following primers were used: forward 5' - TAAAACCACCAGCACCAAA-3' and reverse 5' -CTACGTGTGGCCCGTATCTT-3' for c-FLIP; forward 5' -CCAGAAGATGGAGGAAGCTG-3' and reverse 5' -CGTCTACTGGAGGCTCTTGG-3' for PKC $\zeta$ ; forward 5' -ACGGATTTGGTCGTATTGGG-3' and reverse 5' -TGATTTTGGAGGGATCTCGC-3' for GAPDH. (C) p62 (Dharmacon RNA Technologies, J-010230-05, 80 nmol/L) or scrambled siRNA were transfected into HUVEC which were then stimulated with TNF $\alpha$  (10 ng/mL) for the indicated times and phosphorylation of p65 Ser311 was analyzed by western blotting. (D) Either pcDNA3.1 or PB1-GFP transfected HUVEC were stimulated with TNF $\alpha$  (10 ng/mL) for the indicated times and phosphorylation of p65 Ser311 was analyzed by western blotting. Antibody against p-p65 (Ser311) was purchased from Novus Biologicals (Littleton, CO); anti-p65 from Cell Signaling Technology.
